# Supplementary material for: Allocation in life cycle assessment of lignin
Source: Springer Nature journal article supplement (doi:10.1007/s11367-020-01770-4), 2020-06-05
Supplement: MOESM1 [file 18056192]

# Supplementary material

# Allocation in life cycle assessment of lignin production

## The international Journal of Life Cycle Assessment

*Frida Hermansson*, Matty Janssen & Magdalena Svanström*

Division of Environmental Systems Analysis, Department of Technology Management and Economics, Chalmers University of Technology, Gothenburg, SE-412 96 Sweden

*Corresponding author: [Frida.Hermansson@Chalmers.se](mailto:Frida.Hermansson@Chalmers.se)

## Systems outputs

*Table 1: Outputs used in the mass allocation (Culbertson et al., 2016)*

|  | **Output** | **Unit** |
| --- | --- | --- |
| Pulp | 55300 | kg |
| Lignin | 6110 | kg |
| Soap | 1570 | kg |
| Heat | 70.3 | MWh |

## Exergy values

*Table 2: Exergy values used in the exergy allocation*

|  | **Exergy content** | **Unit** | **Reference** |
| --- | --- | --- | --- |
| Pulp | 18.296 | GJ/tonne | Wall (1988) |
| Lignin | 19.5 | GJ/tonne | Sandin et al. (2015) |
| Soap | 22.6572429 | GJ/tonne | Based on calculations from (Wall, 1988) |
| Heat | 0.18 | kwh/kwh | Sandin et al. (2015) |

## Energy values

*Table 3: Energy values used in for energy allocation, mass-energy allocation and alternative mass-energy allocation*

|  | **Energy content** | **Unit** | **Reference** |
| --- | --- | --- | --- |
| Softwood | 19.25 | MJ/kg | Ireland´s Natural and Renewable Energy Source (2006) |
| Methanol | 22.9 | MJ/kg | Danish Methanol Association (2011) |
| Lignin (HHV) | 25.35 | MJ/kg | Average value from Demirbas (2017) |
| Pulp | 9.8 | MJ/kg | DDS Calorimeters |
| Soap (HHV assumed to be the same as effective heat value for tall oil pitch, scaled to account for 37% of the soap, see below) | 38 | MJ/kg | Forchem (2011) as cited in Niemeläinen (2018) |

The input of softwood is 146.6 tonnes and input of methanol is 0.24 tonnes.

It is assumed that the chemicals used in the pulp production (carbon dioxide, hydrogen peroxide, quicklime, sodium chlorate, sodium hydroxide and sulfuric acid) has no energy content.

No HHV was found for black liquor soap. Instead an HHV value for tall oil pitch was used. 1000 kg of crude tall oil is needed for the production of 370 kg tall oil pitch (Rajendran et al., 2016), meaning that 37% of the crude tall oil is transformed to tall oil pitch. It is assumed that the black liquor soap and crude tall oil are equivalents. As an approximation, the energy content of the black liquor soap is therefor assumed to be 37% of the energy content of tall oil pitch and is calculated using Equation (1)

(1)

## Prices

*Table 4: The assumed prices for the different products of the system, lignin is excluded and included in the article*

|  | **Price (USD/kg or kWh)** | **Reference** |
| --- | --- | --- |
| Pulp (kg) | 0.85 | RISI Price Watch (2014) as cited in in Culbertson et al. (2016) |
| Soap (kg) | 0.117 | ICIS Chemical pricing 2014 in Culbertson et al. (2016) |
| Heat (kWh) | 0.07 | Sandin et al. (2015) |

## Calculations

### Lignin used to produce 1 kg of TBC

All data is from Montazeri and Eckelman (2016)

Lignin based TBC is made from catechol based on lignin from candlenut shells. It is assumed that the same amount of fossil-based raw material (phenol) and bio-based catechol is needed for the production of 1 kg of TBC.

The lignin content in the nut shells is 12%. The potential production of TBC from candlenut shell is 0.04 ton/ton candlenut shell. The mass of shells needed for the production of 1 kg TBC is then calculated by Equation (2)

(2)

As the lignin content in the candlenut shells is 12% the amount of lignin required to produce 1 kg TBC is calculated by using Equation (3)

(3)

### The exergy content in soap

The calculations are based on data from Wall (1988).

There is 0.07 tonne soap/tonne and the exergy content of the soap is 1586 MJ/tonne pulp. The exergy content in soap is then calculated by using Equation (4)

(4)

### Substitution credits for pulp replacing reading a magazine on a tablet

The impacts for reading a magazine on a tablet on a tablet is based on data from Achachlouei and Moberg (2015); Ahmadi Achachlouei et al. (2015).

#### Per kg lignin

One person reading a magazine on a tablet emits 0.04 kg CO2 eq.

The mass of a magazine is 499 grams=0.499 kg and 4.4 people on average reads a physical copy of the magazine. There is an output of 55300 kg pulp/6110 kg lignin=9 kg pulp/kg lignin which means that magazines can be made from the pulp corresponding to the output of the lignin. This corresponds to 18*4.4=79.8 people reading a magazine, the avoided impact is then 79.8*0.04=3.19 kg CO2 eq./kg lignin.

#### Per kg pulp

1 kg of pulp replaces copies of magazine being produced. As 4.4 on average reads one magazine copy 2.0*4.4=8.8 readings will be replaced. This corresponds to 8.8*0.04=0.35 kg CO2/kg pulp.

# References

Achachlouei, M. A., & Moberg, Å. (2015). Life cycle assessment of a magazine, part II: A comparison of print and tablet editions. *Journal of Industrial Ecology, 19*(4), 590-606. doi:<https://doi.org/10.1111/jiec.12229>

Ahmadi Achachlouei, M., Moberg, Å., & Hochschorner, E. (2015). Life Cycle Assessment of a magazine, part I: Tablet edition in emerging and mature states. *Journal of Industrial Ecology, 19*(4), 575-589. doi:<https://doi.org/10.1111/jiec.12227>

Culbertson, C., Treasure, T., Venditti, R., Jameel, H., & Gonzalez, R. (2016). Life Cycle Assessment of lignin extraction in a softwood kraft pulp mill. *Nordic Pulp & Paper Research Journal, 31*(1), 30-U247. doi:<https://doi.org/10.3183/npprj-2016-31-01-p030-040>

Danish Methanol Association. (2011). Bio-Methanol. Retrieved from <http://www.starch.dk/methanol/energy/img/TM01-02e.pdf>

DDS Calorimeters. Energy from biomass in pulp & paper. Retrieved from <https://www.ddscalorimeters.com/energy-from-biomass-in-pulp-paper-mills/>

Demirbas, A. (2017). Higher heating values of lignin types from wood and non-wood lignocellulosic biomasses. *Energ Source Part A, 39*(6), 592-598. doi:<https://doi.org/10.1080/15567036.2016.1248798>

Ireland´s Natural and Renewable Energy Source. (2006). List and values of wood fuel parameters. Retrieved from <http://www.woodenergy.ie/woodasafuel/listandvaluesofwoodfuelparameters-part1/>

Montazeri, M., & Eckelman, M. J. (2016). Life cycle assessment of catechols from lignin depolymerization. *ACS Sustainable Chemistry & Engineering, 4*(3), 708-718. doi:<https://doi.org/10.1021/acssuschemeng.5b00550>

Niemeläinen, M. (2018). *Tall oil depitching in kraft pulp mill.* (Master ́s Programme in Chemical, Biochemical and Materials Engineering), Aalto University School of Chemical Engineering. Retrieved from <https://aaltodoc.aalto.fi/bitstream/handle/123456789/33676/master_Niemel>äinen_Mikko_2018.pdf?sequence=1&isAllowed=y

Rajendran, V., Breitkreutz, K., Kraft, A., Maga, D., & Font Brucart, M. (2016). *Analysis of the european crude tall oil industry-environmental imapct, socio-economic value and downstream potential*. Retrieved from <https://www.harrpa.eu/images/Publications/EU_CTO_Added_Value_Study_Fin.pdf>

Sandin, G., Røyne, F., Berlin, J., Peters, G. M., & Svanström, M. (2015). Allocation in LCAs of biorefinery products: implications for results and decision-making. *Journal of Cleaner Production, 93*, 213-221. doi:<https://doi.org/10.1016/j.jclepro.2015.01.013>

Wall, G. (1988). Exergy flows in industrial processes. *Energy, 13*(2), 197-208.
